# Supplementary material for: A Bayesian model selection approach to mediation analysis
Source: PubMed Central journal article supplement (PMC9129027; doi:10.1371/journal.pgen.1010184), 2022-05-09
Supplement: pgen.1010184.s007.pdf [file pgen.1010184.s007.pdf]

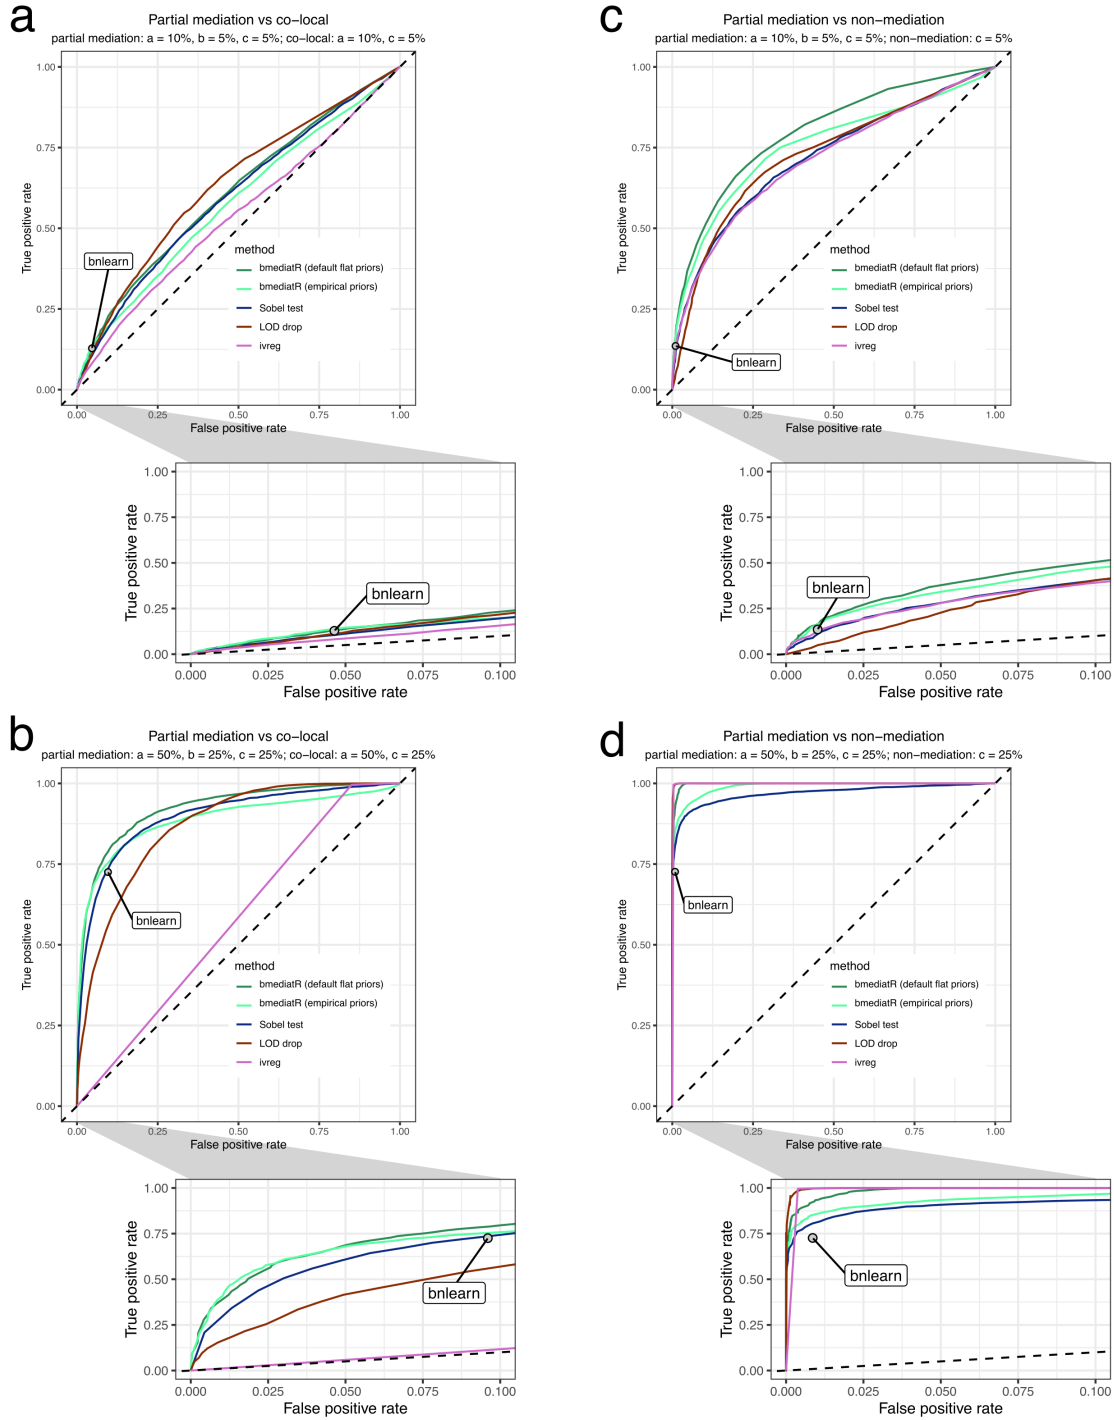

**S7 Fig. Performance of Bayesian model selection compared with other methods in distinguishing partial mediation from (a-b) co-local and (c-d) non-mediation.** True positive rates (power) and false positive rates were estimated from 5,000 simulations of 24 individuals according to a balanced bi-allelic variant X. Results are shown for data simulated with both (a-c) small genetic effects ( $X \rightarrow M: 10\%$ ,  $M \rightarrow Y: 5\%$ ,  $X \rightarrow Y: 5\%$ ) and (b-d) large genetic effects ( $X \rightarrow M: 50\%$ ,  $M \rightarrow Y: 25\%$ ,  $X \rightarrow Y: 25\%$ ). Diagonal dashed line is included for reference, representing a classifier with no ability to distinguish complete mediation from co-local or non-mediation. See Fig 3 for methods' performance in distinguishing complete mediation from co-local and non-mediation.
