# Supplementary material for: A Bayesian model selection approach to mediation analysis
Source: PubMed Central journal article supplement (PMC9129027; doi:10.1371/journal.pgen.1010184), 2022-05-09
Supplement: pgen.1010184.s009.pdf [file pgen.1010184.s009.pdf]

**S1 Table: Features of the evaluated causal inference methods**

| Method     | Multi-state X | Complete vs partial | Mediation vs non-mediation | Priors | Summary                               |
|------------|---------------|---------------------|----------------------------|--------|---------------------------------------|
| bmediatR   | x             | x                   | x                          | $X^b$  | Model posterior probabilities         |
| Sobel test |               |                     | x                          |        | Indirect effect $p$ -value            |
| LOD drop   | x             |                     | x                          |        | Change in LOD score                   |
| ivreg      | x             |                     | x                          |        | Causal effect $p$ -value <sup>d</sup> |
| bnlearn    | $X^a$         | x                   | x                          | $X^c$  | Best model (0/1)                      |

<sup>a</sup>Selects from columns of X matrix, which could be appealing for multiple genetic variants but unappealing for multi-state genotypes.

<sup>b</sup>Effect size priors (default: 50% for a, b, and c) and model priors (default: equal probabilities, excluding reactive models).

<sup>c</sup>Model priors (limited to fixing or excluding relationships). Graph priors have similar effect to effect size priors of bmediatR.

<sup>d</sup>Assumes complete mediation (no direct effect of X on Y).
